## Correction: Physiological characterization of a novel PPAR pan agonist, 2-(4-(5,6-methylenedioxybenzo[d]thiazol-2-yl)-2-methylphenoxy)-2-methylpropanoic acid (MHY2013)

Hye Jin An, Bonggi Lee, Dae Hyun Kim, Eun Kyeong Lee, Ki Wung Chung, Min Hi Park, Hyoung Oh Jeong, Sung Min Kim, Kyoung Mi Moon, Ye Ra Kim, Seong Jin Kim, Hwi Young Yun, Pusoon Chun, Byung Pal Yu, Hyung Ryong Moon and Hae Young Chung

Copyright: An et al. This is an open-access article distributed under the terms of the Creative Commons Attribution License (CC-BY), which permits unrestricted use, distribution, and reproduction in any medium, provided the original author and source are credited.

**Present:** The author name ‘Sung Min Kim’ is spelled incorrectly.

**Correct:** The proper spelling is ‘Seong Min Kim’.

Original article: Oncotarget. 2017; 8:16912-16924. <https://doi.org/10.18632/oncotarget.14818>
